# Supplementary material for: Capture, isolation and release of cancer cells with aptamer-functionalized glass bead array
Source: Royal Society of Chemistry journal article supplement (doi:10.1039/c2lc21251j), 2012-01-01
Supplement: c2lc21251j.pdf [file c2lc21251j.pdf]

## Lab on a Chip

### Electronic Supplementary Information

# Capture, Isolation and Release of Cancer Cells with Aptamer-functionalized Glass Bead Array

Yuan Wan<sup>1,2,3,§</sup>, Yaling Liu<sup>4,§</sup>, Peter B. Allen<sup>5</sup>, Waseem Asghar<sup>2,3,6</sup>, M. Arif Iftakher Mahmood<sup>2,3,6</sup>, Jifu Tan<sup>4</sup>, Holli Duhon<sup>5</sup>, Young-tae Kim<sup>1,3</sup>, Andrew D. Ellington<sup>5</sup> and Samir M. Iqbal<sup>1,2,3,6,7,\*</sup>

<sup>1</sup>Department of Bioengineering, <sup>2</sup>Nano-Bio Lab, <sup>3</sup>Nanotechnology Research and Teaching Facility, University of Texas at Arlington, Arlington, Texas; <sup>4</sup>Department of Mechanical Engineering and Mechanics, Bioengineering Program, Lehigh University, Bethlehem, Pennsylvania; <sup>5</sup>Institute for Cell and Molecular Biology, University of Texas at Austin, Austin, Texas; <sup>6</sup>Department of Electrical Engineering, University of Texas at Arlington, Arlington, Texas; <sup>7</sup>Joint Graduate Committee of Bioengineering Program, University of Texas at Arlington and University of Texas Southwestern Medical Center at Dallas, University of Texas at Arlington, Arlington, Texas

§ These authors contributed equally to this work

\*Corresponding Author: Samir M. Iqbal, Ph.D.

4 Figures

1 Table

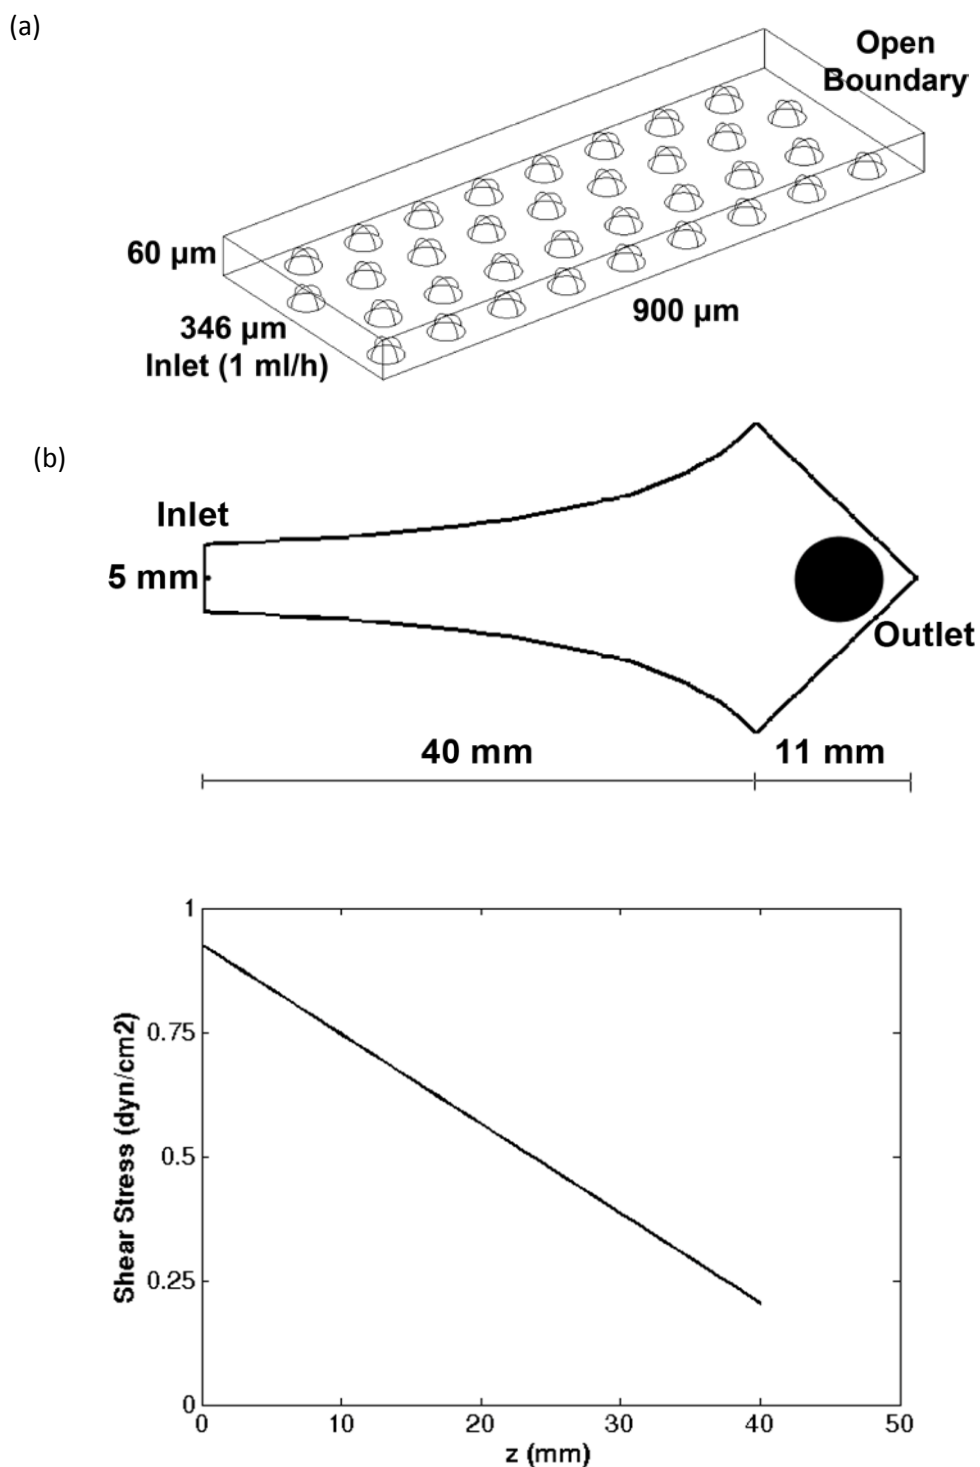

Figure S1. (a) The numerical model of a GB array channel with dimensions 346  $\mu\text{m}$  (width) X 900  $\mu\text{m}$  (length) X 60  $\mu\text{m}$  (height). The GB loaded channel is used to analyze velocity pattern, shear stress, stream lines, trajectory and cell adhesion probability. The flow rate is set to 1 ml h<sup>-1</sup> at the inlet and the other side is open boundary. (b) The device structure and dimensions of 60  $\mu\text{m}$  thick Hele-Shaw device made with SU8 master. The plot shows gradually decreasing shear stress along the flow axis.

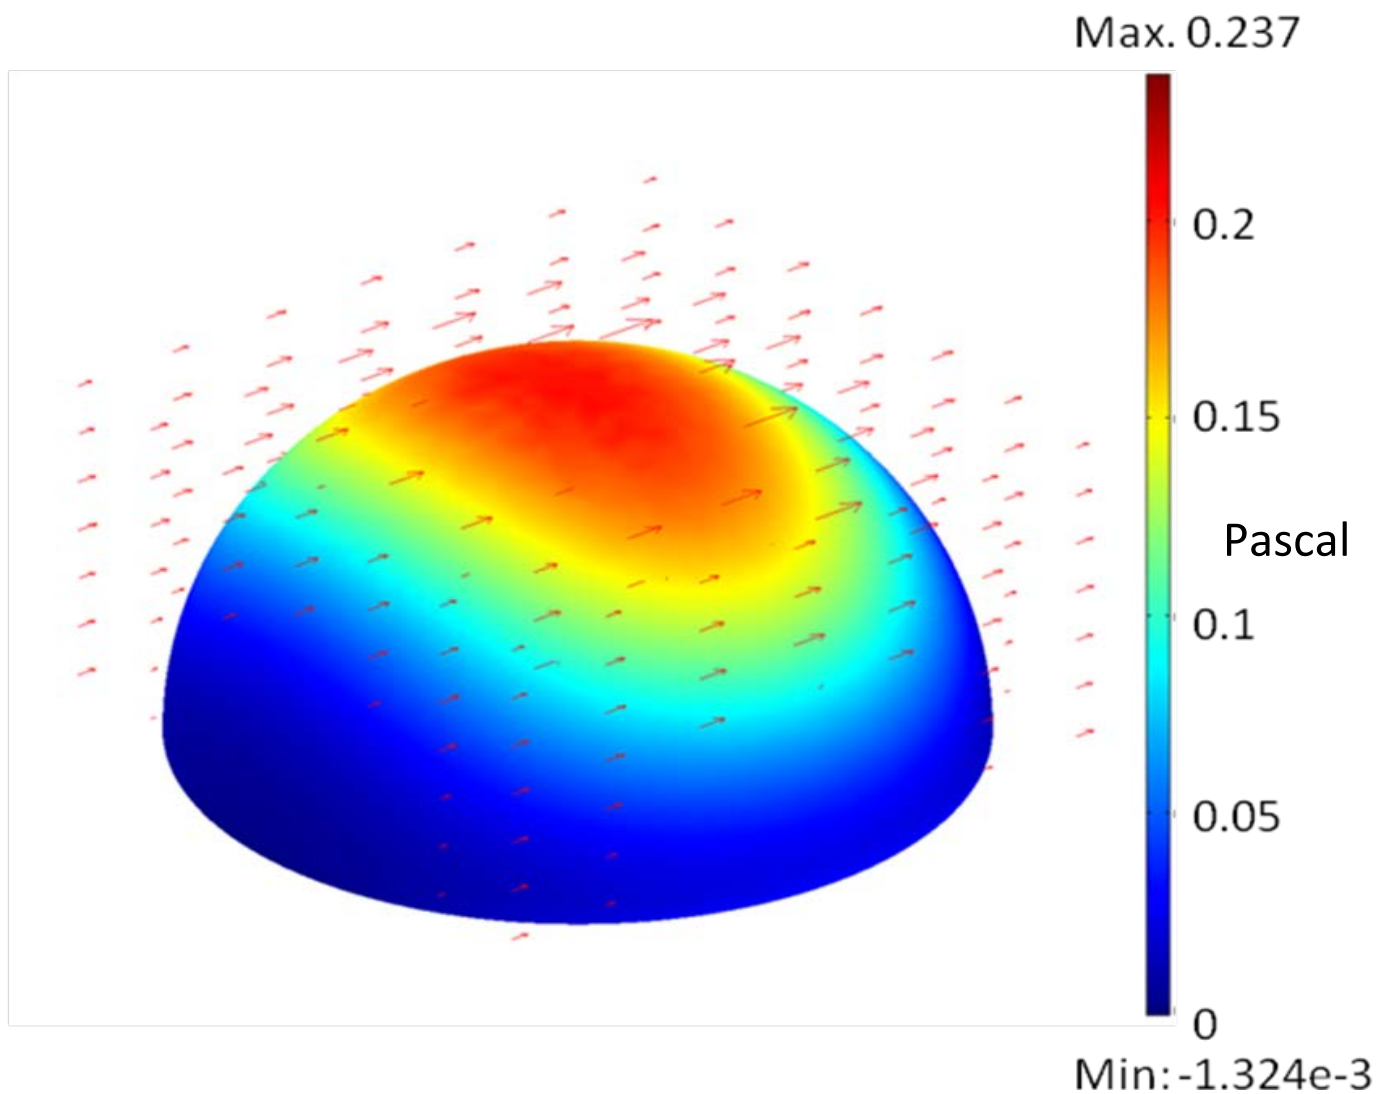

Figure S2. Shear stress on the surface of a glass bead. The maximum shear stress appears on the top of the bead and gradually decreases from top to bottom.

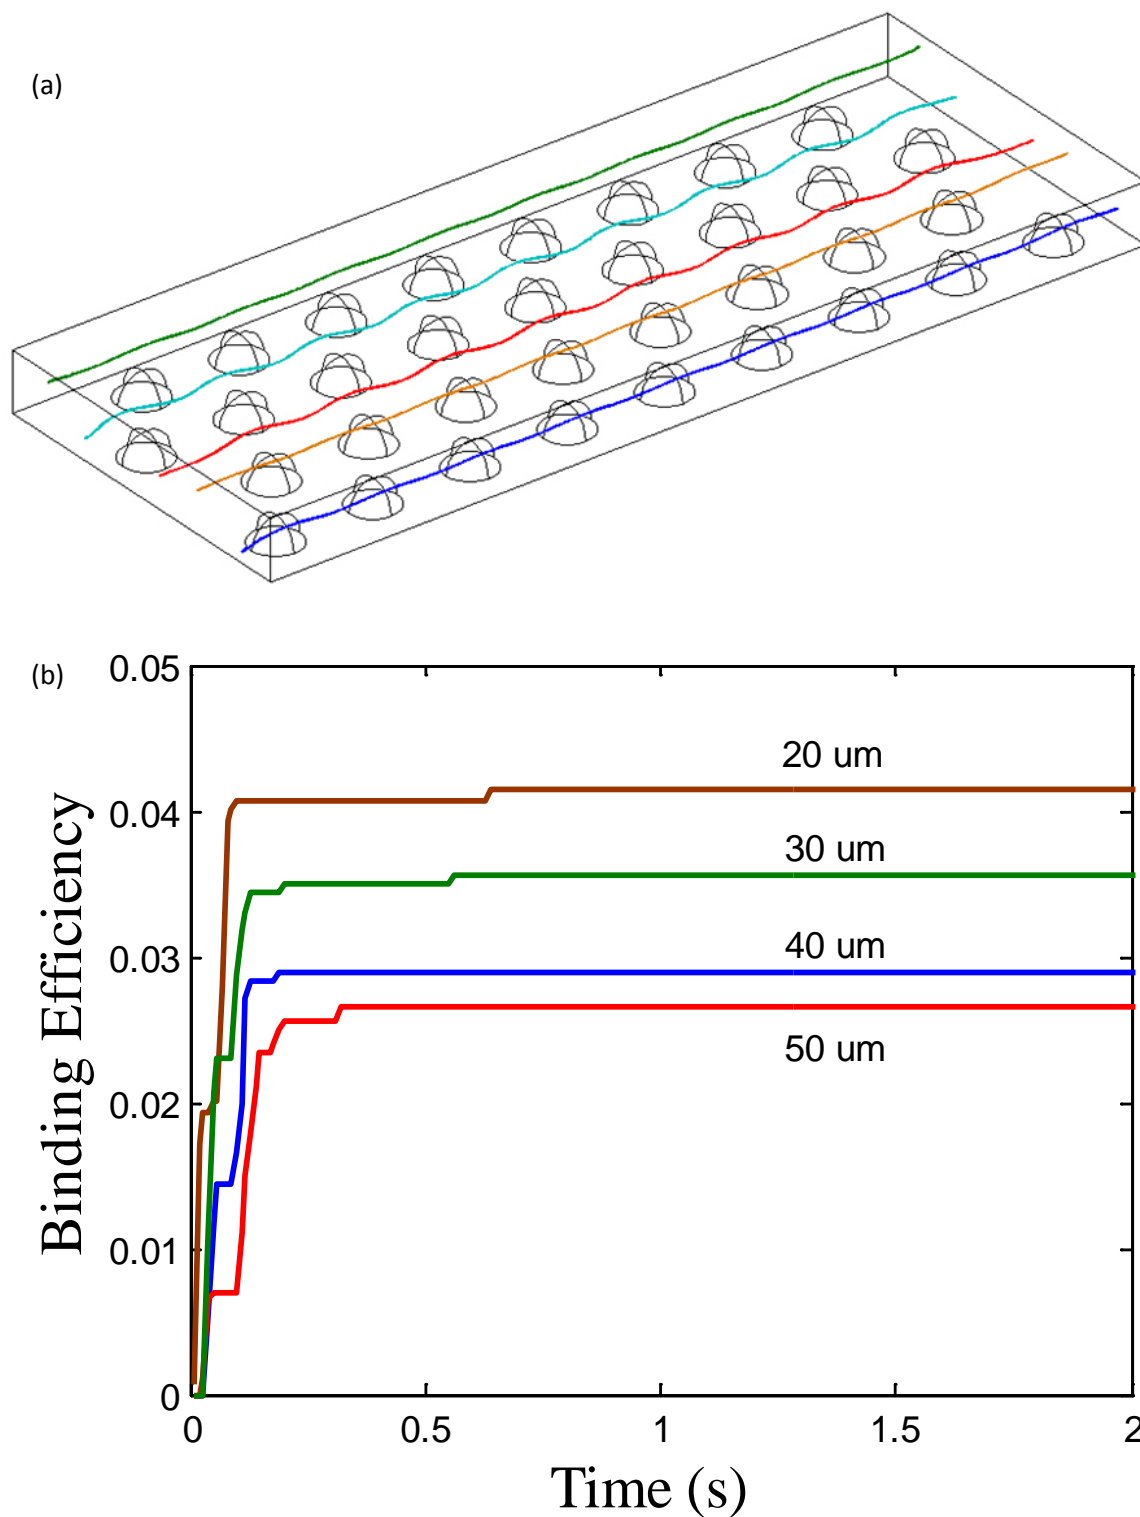

Figure S3. (a) Typical trajectories of cells injected in the microfluidic device; (b) Binding efficiency of cells as a function of time for devices with different separation distances. The shear stress increased from 0.237 Pa to 0.303 Pa when the distance between adjacent GBs decreased from 50 to 20  $\mu\text{m}$ , and binding efficiency increased from 1% to 4%.

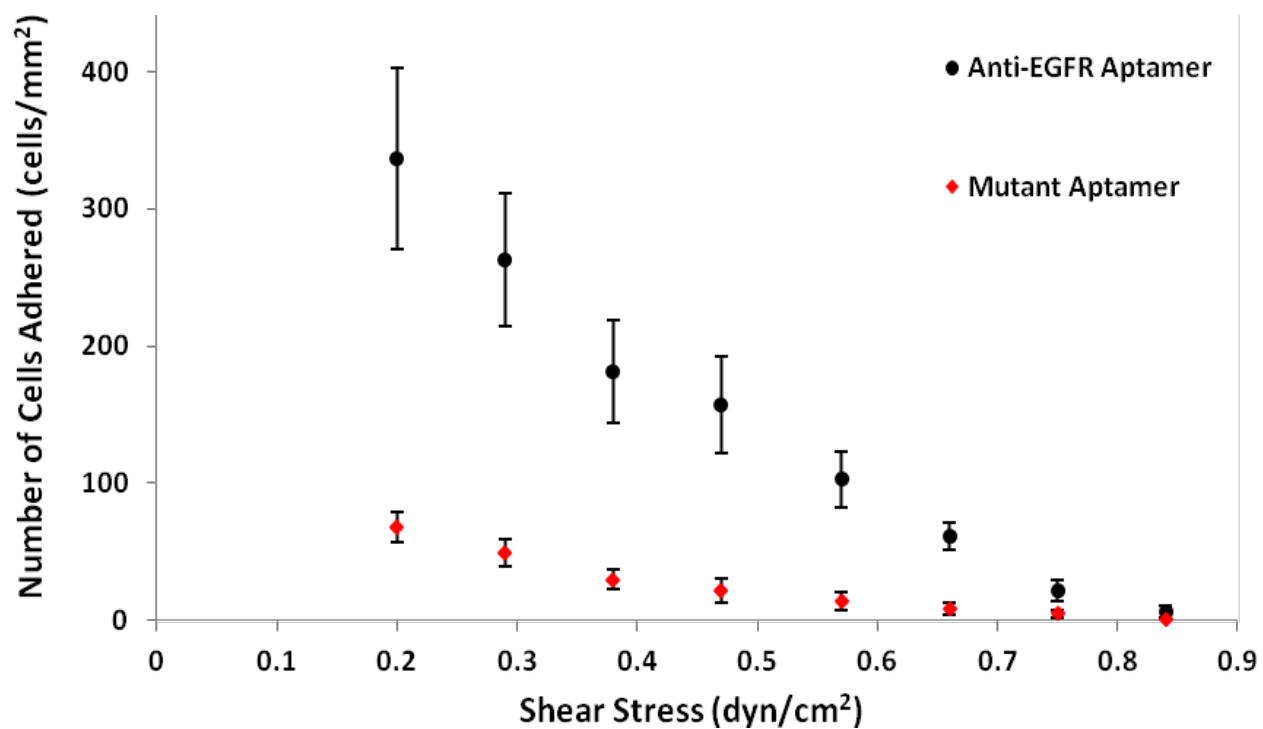

Figure S4. The number of hGBM cells binding to anti-EGFR and mutant aptamer functionalized glass substrates at increased shear stresses.

Table S1. Peclet Numbers corresponding to the shear stress depicted in Fig. S4 of ESI.

|                                              |        |        |        |        |        |      |        |        |
|----------------------------------------------|--------|--------|--------|--------|--------|------|--------|--------|
| <b>Shear Stress<br/>(dyn/cm<sup>2</sup>)</b> | 0.2    | 0.29   | 0.38   | 0.47   | 0.57   | 0.66 | 0.75   | 0.84   |
| <b><i>Pe</i> (x10<sup>5</sup>)</b>           | 2.0455 | 2.9659 | 3.8864 | 4.8068 | 5.8295 | 6.75 | 7.6705 | 8.5909 |
